# Supplementary material
Source: MDPI journal article supplement (https://www.mdpi.com/2411-5118/3/3/29)
Supplement: s1 [file s1]

**Table S1.** Key terms used for database searches.

---

Scopus: ( TITLE-ABS-KEY ( *lgbt* OR *lgbtq* OR *glbt* OR *gay* OR *bisexual* OR *lesbian* OR *pansexual* OR *asexual* OR "*sexuality minority*" OR "*gender minority*" OR *transsexual* OR *transgender* OR *nonbinary* OR *genderfluid* OR *intersex* OR *queer* OR *homosexual* OR *homosexuality* OR "*sexual orientation*" OR "*sexual identity*" OR "*gender identity*" OR "*men who have sex with men*" ) AND TITLE-ABS-KEY ( "*cultural safety*" ) ) AND PUBYEAR > 2010

---

PsycINFO: LGBT OR LGBTQ OR GLBT OR gay OR bisexual OR lesbian OR pansexual OR asexual OR "sexuality minority" OR "gender minority" OR transsexual OR transgender OR nonbinary OR genderfluid OR intersex OR queer OR homosexual OR homosexuality OR "sexual orientation" OR "sexual identity" OR "gender identity" OR "men who have sex with men" AND **Keywords:** "cultural safety" AND **Year:** 2011 To 2022

---
